# Supplementary material
Source: PubMed Central journal article supplement (PMC5293339)
Supplement: CJN.07170716SupplementaryData.pdf [file CJN.07170716SupplementaryData.pdf]

**Supplementary Table 1. Reasons for non-adherence to SCAMP recommendations on discontinuing RRT**

| <b>Reasons for continuing RRT when SCAMP recommended to discontinue<br/>N=36*</b> | <b>N (%)</b> |
|-----------------------------------------------------------------------------------|--------------|
| Remains volume overloaded                                                         | 25 (69%)     |
| Worsening creatinine                                                              | 9 (25%)      |
| Remains uremic                                                                    | 6 (17%)      |
| Disagree with SCAMP recommendation                                                | 2 (6%)       |
| Other:                                                                            | 11 (31%)     |
| receiving intravenous fluids                                                      | 3            |
| acute respiratory distress syndrome                                               | 2            |
| therapeutic trial to see if mental status improves                                | 1            |
| worsening creatinine off CVVH                                                     | 1            |
| tumor lysis syndrome                                                              | 1            |
| RRT continued because patient on chemotherapy                                     | 1            |
| lung transplant team requested continuation                                       | 1            |
| not enough clearance                                                              | 1            |
| <b>Reasons for discontinuing RRT when SCAMP recommended to continue N=19</b>      | <b>N (%)</b> |
| Medical futility                                                                  | 10 (53%)     |
| Comfort measures only                                                             | 10 (53%)     |
| Other:                                                                            | 8 (42%)      |
| patient passed away                                                               | 2            |
| unable to tolerate CVVH due to very poor hemodynamics                             | 1            |
| hypoxemia, SaO <sub>2</sub> 69%, on ventilator with FiO <sub>2</sub> 100%         | 1            |
| discontinued catheter due to fever, question of sepsis                            | 1            |
| line holiday given infection, potassium at goal                                   | 1            |
| creatinine improving                                                              | 1            |

Values represent N (%) unless otherwise stated. Abbreviations: RRT, renal replacement therapy; SCAMP, standardized clinical assessment and management plan; CVVH, continuous venovenous hemofiltration; SaO<sub>2</sub>, saturation of oxygen; FiO<sub>2</sub>, fraction of inspired oxygen  
\*Multiple selections were possible, therefore total number of deviations greater than N=36

**Supplementary Table 2. Patient demographics and clinical characteristics based on SCAMP adherence**

| <b>Patient Characteristics</b>                     | <b>Adhered<br/>N=102</b> | <b>Did Not Adhere<br/>N=60</b> | <b>p-value</b> |
|----------------------------------------------------|--------------------------|--------------------------------|----------------|
| Male                                               | 58 (57%)                 | 35 (58%)                       | 0.86           |
| Age, median (IQR)                                  | 59 (49, 70)              | 63 (54, 72)                    | 0.28           |
| <b>Race</b>                                        |                          |                                |                |
| White                                              | 82 (82)                  | 51 (86)                        | 1.00           |
| African American                                   | 11 (11)                  | 5 (8)                          |                |
| Hispanic                                           | 6 (6)                    | 2 (3)                          |                |
| Asian                                              | 1 (1)                    | 1 (2)                          |                |
| <b>Reasons for Acute Kidney Injury<sup>a</sup></b> |                          |                                |                |
| Hypotension                                        | 55 (54)                  | 34 (57)                        | 0.73           |
| Sepsis                                             | 42 (41)                  | 34 (57)                        | 0.06           |
| Pre-renal azotemia                                 | 34 (33)                  | 17 (28)                        | 0.51           |
| Contrast                                           | 8 (8)                    | 8 (13)                         | 0.26           |
| Other nephrotoxin                                  | 10 (10)                  | 5 (8)                          | 0.76           |
| Cardiorenal syndrome                               | 2 (2)                    | 5 (8)                          | 0.05           |
| Obstruction                                        | 4 (4)                    | 3 (5)                          | 0.74           |
| Rhabdomyolysis                                     | 6 (6)                    | 0 (0)                          | 0.06           |
| Thrombotic microangiopathy                         | 4 (4)                    | 2 (3)                          | 0.85           |
| Hepatorenal syndrome                               | 1 (1)                    | 5 (8)                          | 0.02           |
| Hemolysis                                          | 2 (2)                    | 3 (5)                          | 0.28           |
| Vasculitis                                         | 4 (4)                    | 0 (0)                          | 0.12           |
| Glomerulonephritis                                 | 2 (2)                    | 2 (3)                          | 0.59           |
| Tubulointerstitial nephritis                       | 4 (4)                    | 0 (0)                          | 0.12           |
| Other                                              | 16 (16)                  | 8 (13)                         | 0.68           |
| <b>Chronic Health Condition</b>                    |                          |                                |                |
| Chronic hypoxemia                                  | 12(12%)                  | 13(22%)                        | 0.02           |
| Malignancy                                         | 43(42%)                  | 21(35%)                        | 0.37           |
| Immunosuppressive therapy                          | 33(32%)                  | 18(30%)                        | 0.76           |
| Cardiovascular disease                             | 16(16%)                  | 24(40%)                        | 0.005          |
| Post-surgery                                       | 10(10%)                  | 4(7%)                          | 0.49           |
| <b>Vitals at Enrollment</b>                        |                          |                                |                |
| Mean arterial pressure (mean(sd))                  | 78 (14)                  | 75 (13)                        | 0.25           |
| Serum albumin (mean(sd))                           | 2.5 (0.6)                | 2.5(0.7)                       | 0.88           |
| FiO <sub>2</sub> ≥ 0.6                             | 34(33%)                  | 21 (35%)                       | 0.82           |
| Mechanical ventilation                             | 45 (44%)                 | 38 (63%)                       | 0.02           |
| <b>Type of RRT by Enrollment</b>                   |                          |                                |                |
| None                                               | 58(57%)                  | 32(53%)                        |                |
| CVVH                                               | 8 (8%)                   | 4(7%)                          |                |
| HD                                                 | 27(26%)                  | 15(25%)                        |                |

|                                                    |                   |                    |       |
|----------------------------------------------------|-------------------|--------------------|-------|
| CVVH and HD                                        | 9(8%)             | 9(15%)             | 0.20  |
| <b>Length of Stay (LOS), median (IQR)</b>          |                   |                    |       |
| MICU (days)                                        | 18(4,65)          | 65(16,65)          | 0.006 |
| Hospital (days)                                    | 47(16,119)        | 119(27,119)        | 0.03  |
| <b>Probability of 60 day mortality<sup>b</sup></b> | 0.45 (0.03, 0.95) | 0.55 ( 0.07, 0.97) | 0.02  |

Values represent N (%) unless otherwise stated. Abbreviations: RRT, renal replacement therapy; CVVH, continuous venovenous hemofiltration; HD, hemodialysis; MICU, medical intensive care unit.

a. Clinical diagnoses of acute kidney injury specified by clinicians caring for the patient

b. Risk equation by Demirjian S, Chertow GM, Zhang JH et al. (18)

**Supplementary Table 3. Patient demographics and clinical characteristics based on SCAMP adherence for patients with low disease severity**

| <b>Patient Characteristics</b>                     | <b>Adhered<br/>N=63</b> | <b>Did Not Adhere<br/>N=31</b> | <b>p-value</b> |
|----------------------------------------------------|-------------------------|--------------------------------|----------------|
| Male                                               | 38(60%)                 | 17(55%)                        | 0.61           |
| Age, median (IQR)                                  | 58 (48, 68)             | 66 (49, 72)                    | 0.30           |
| <b>Race</b>                                        |                         |                                |                |
| White                                              | 53 (87)                 | 26 (87)                        | 1.00           |
| African American                                   | 5 (8)                   | 2 (7)                          |                |
| Hispanic                                           | 3 (5)                   | 1 (3)                          |                |
| <b>Reasons for Acute Kidney Injury<sup>a</sup></b> |                         |                                |                |
| Hypotension                                        | 31 (49)                 | 13 (42)                        | 0.51           |
| Sepsis                                             | 22 (35)                 | 12 (39)                        | 0.72           |
| Pre-renal azotemia                                 | 23 (37)                 | 9 (29)                         | 0.47           |
| Other nephrotoxin                                  | 8 (13)                  | 1 (3)                          | 0.14           |
| Contrast                                           | 3 (5)                   | 3 (10)                         | 0.36           |
| Obstruction                                        | 3 (5)                   | 3 (10)                         | 0.36           |
| Rhabdomyolysis                                     | 4 (6)                   | 0 (0)                          | 0.15           |
| Thrombotic microangiopathy                         | 3 (5)                   | 1 (3)                          | 0.73           |
| Cardiorenal syndrome                               | 1 (2)                   | 3 (10)                         | 0.07           |
| Vasculitis                                         | 4 (6)                   | 0 (0)                          | 0.15           |
| Hemolysis                                          | 1 (2)                   | 2 (6)                          | 0.21           |
| Glomerulonephritis                                 | 2 (3)                   | 1 (3)                          | 0.99           |
| Tubulointerstitial nephritis                       | 3 (5)                   | 0 (0)                          | 0.22           |
| Hepatorenal syndrome                               | 0 (0)                   | 2 (6)                          |                |
| Other                                              | 8 (13)                  | 7 (23)                         | 0.24           |
| <b>Chronic Health Condition</b>                    |                         |                                |                |
| Chronic hypoxemia                                  | 8 (13%)                 | 6 (19%)                        | 0.03           |
| Malignancy                                         | 24 (38%)                | 7(23%)                         | 0.12           |
| Immunosuppressive therapy                          | 20(32%)                 | 5(16%)                         | 0.11           |
| Cardiovascular disease                             | 10(16%)                 | 13(42%)                        | 0.006          |
| Post-surgery                                       | 8 (13%)                 | 3 (10%)                        | 1.00           |
| <b>Vitals at Enrollment</b>                        |                         |                                |                |
| Mean arterial pressure (mean(sd))                  | 79(15)                  | 76(11)                         | 0.46           |
| Serum albumin (mean(sd))                           | 2.7(0.6)                | 2.7(0.7)                       | 0.79           |
| FiO <sub>2</sub> ≥ 0.6                             | 8 (13%)                 | 1 (3%)                         | 0.26           |
| Mechanical ventilation                             | 20 (32%)                | 17((55%)                       | 0.03           |
| <b>Type of RRT by Enrollment</b>                   |                         |                                |                |
| None                                               | 43(68%)                 | 18(58%)                        |                |
| HD                                                 | 6(10%)                  | 3 (10%)                        |                |
| CVVH                                               | 12 (19%)                | 7 (23%)                        |                |
| CVVH and HD                                        | 2(3%)                   | 3(10%)                         | 0.008          |
| <b>Length of Stay (LOS), median (IQR)</b>          |                         |                                |                |

|                                                    |                 |                  |      |
|----------------------------------------------------|-----------------|------------------|------|
| MICU (days)                                        | 6 (3, 65)       | 65(5,65)         | 0.01 |
| Hospital (days)                                    | 27 (15, 119)    | 119(14, 119)     | 0.06 |
| <b>Probability of 60 day mortality<sup>b</sup></b> | .19 (.02, 0.52) | 0.25(0.05, 0.55) | 0.24 |

Values represent N (%) unless otherwise stated. Abbreviations: RRT, renal replacement therapy; CVVH, continuous venovenous hemofiltration; HD, hemodialysis; MICU, medical intensive care unit.

a. Clinical diagnoses of acute kidney injury specified by clinicians caring for the patient

b. Risk equation by Demirjian S, Chertow GM, Zhang JH et al. (19)

## Supplemental Methods

The medical intensive care unit (MICU) at Brigham and Women's Hospital consists of 20-beds, and is staffed by nurses, residents, fellows and attendings. The nephrology service functions as a consulting service in the MICU, providing recommendations to the primary team, and makes decisions and writes orders regarding renal replacement therapy (RRT) initiation, modality choice and discontinuation. Patients with AKI requiring RRT all therefore require a nephrology consult. Patients with previous MICU admissions during hospitalization were excluded. This exclusion criterion was chosen for two reasons: 1) to avoid multiple admissions of the same individual during the same hospitalization, since some patients are in fact transferred multiple times as disease severity changes and MICU or floor bed availability changes; and 2) to avoid having periods of missing data for such individuals. The SCAMP served as a real-time prompt for clinicians as they were asked to complete the SCAMP form during their daily assessment of the patient. The SCAMP forms were available during the daily rounds completed by the nephrology fellow and the attending.
